# Supplementary material for: Insights on Pb(ii) retention and immobilization by ferrihydrite in the presence of Al(iii) and oxalic acid
Source: Royal Society of Chemistry journal article supplement (doi:10.1039/d2en00083k), 2022-01-01
Supplement: d2en00083k1.pdf [file d2en00083k1.pdf]

## Supplementary materials

### Insights on Pb(II) retention and immobilization by ferrihydrite in the presence of Al(III) and oxalic acid

Peijing Yu<sup>a</sup>, Parisa A. Ariya<sup>b,c</sup>, Fenglian Fu<sup>a,\*</sup>, Bing Tang<sup>a</sup>

<sup>a</sup> *School of Environmental Science and Engineering, Guangdong University of Technology, Guangzhou 510006, China*

<sup>b</sup> *Department of Atmospheric & Oceanic Sciences, McGill University, Montreal, PQ H3A 0B9, Canada*

<sup>c</sup> *Department of Chemistry, McGill University, Montreal, PQ H3A 0B8, Canada*

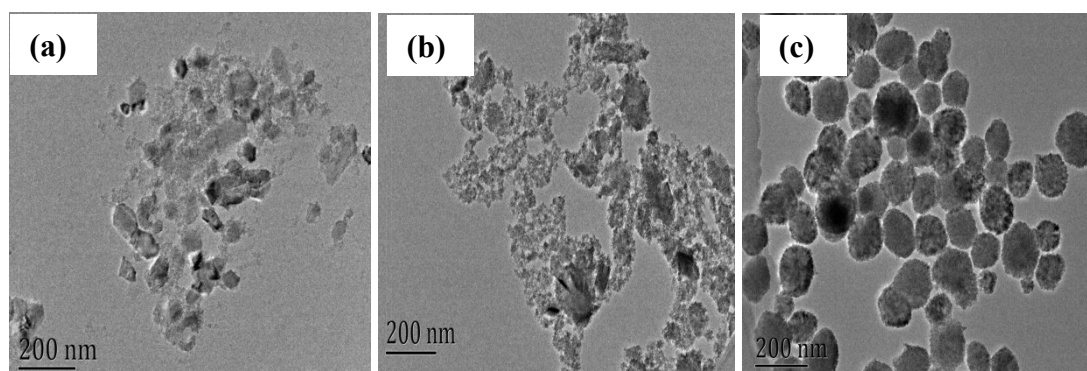

**Fig. S1** TEM of (a) Fh-Pb, (b) Fh-Al-Pb in the absence of oxalic acid and (c) Fh-Al-Pb in the presence of oxalic acid after transformation (pH<sub>0</sub> 7.0).

---

\* Corresponding author.

E-mail address: fufenglian2006@163.com (Fenglian Fu)

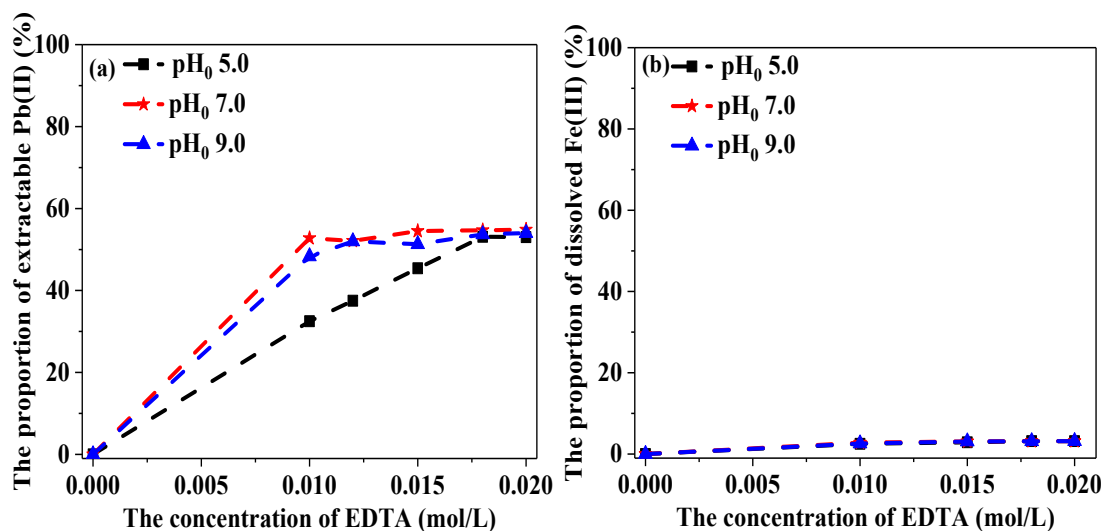

**Fig. S2** The proportions of (a) extractable Pb(II) and (b) dissolved Fe(III) under different concentrations of EDTA during Fh-Pb aging.

According to Fig. S2(a), the proportion of extractable Pb(II) increased with the increase of EDTA concentration firstly and reached a stable level after 0.0175 M at all initial pH values. To extract more Pb(II) and reduce the use of EDTA, 0.02 M EDTA was chosen in this study.

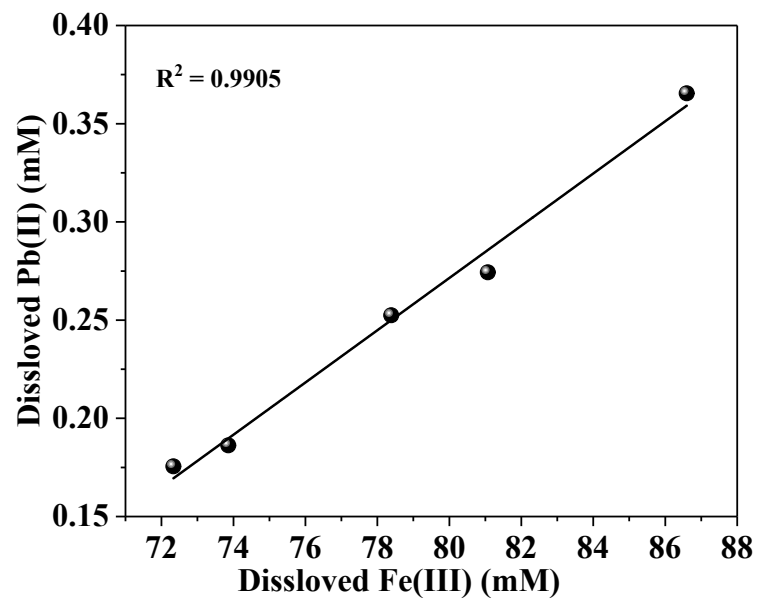

**Fig. S3** Linear correlations between total dissolved Pb(II) and total dissolved Fe(III) during transformation of Fh-Al-Pb in the presence of oxalic acid for 120 min.

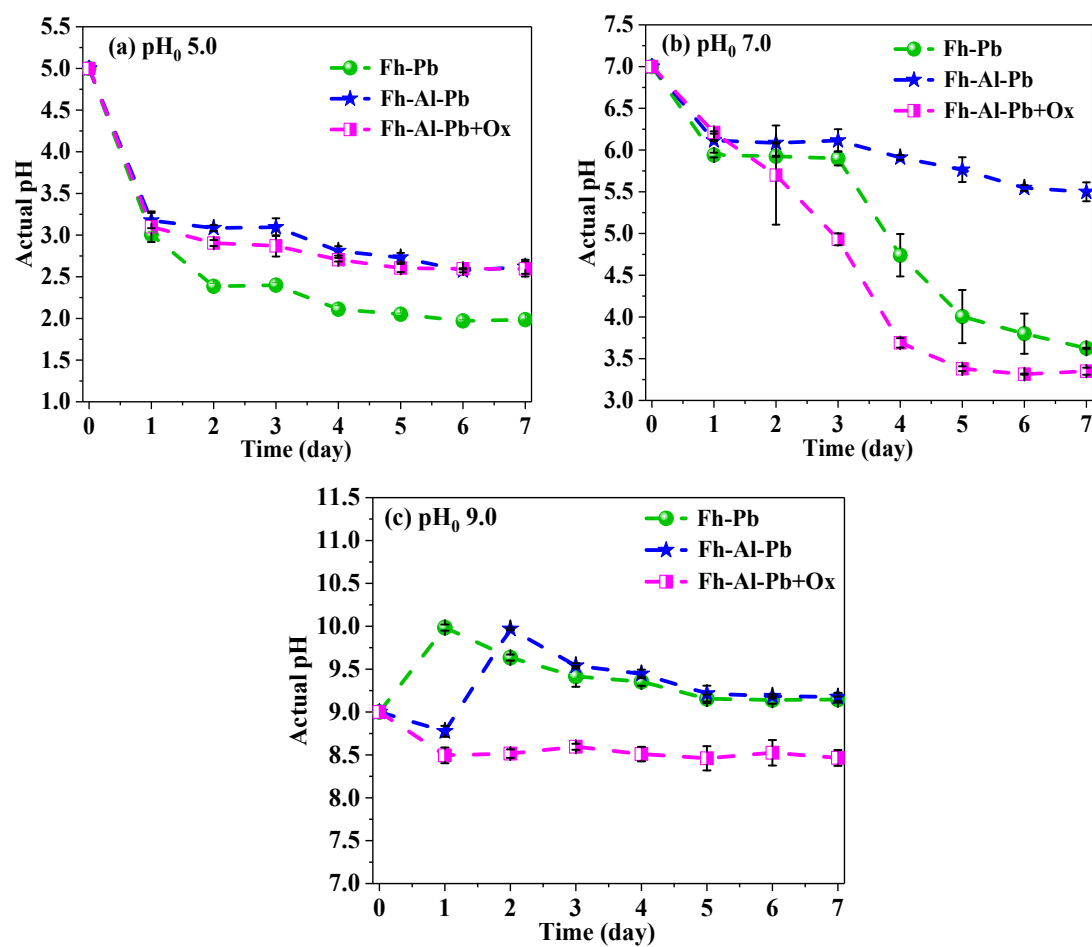

**Fig. S4** The changes of pH values in solutions during transformation.

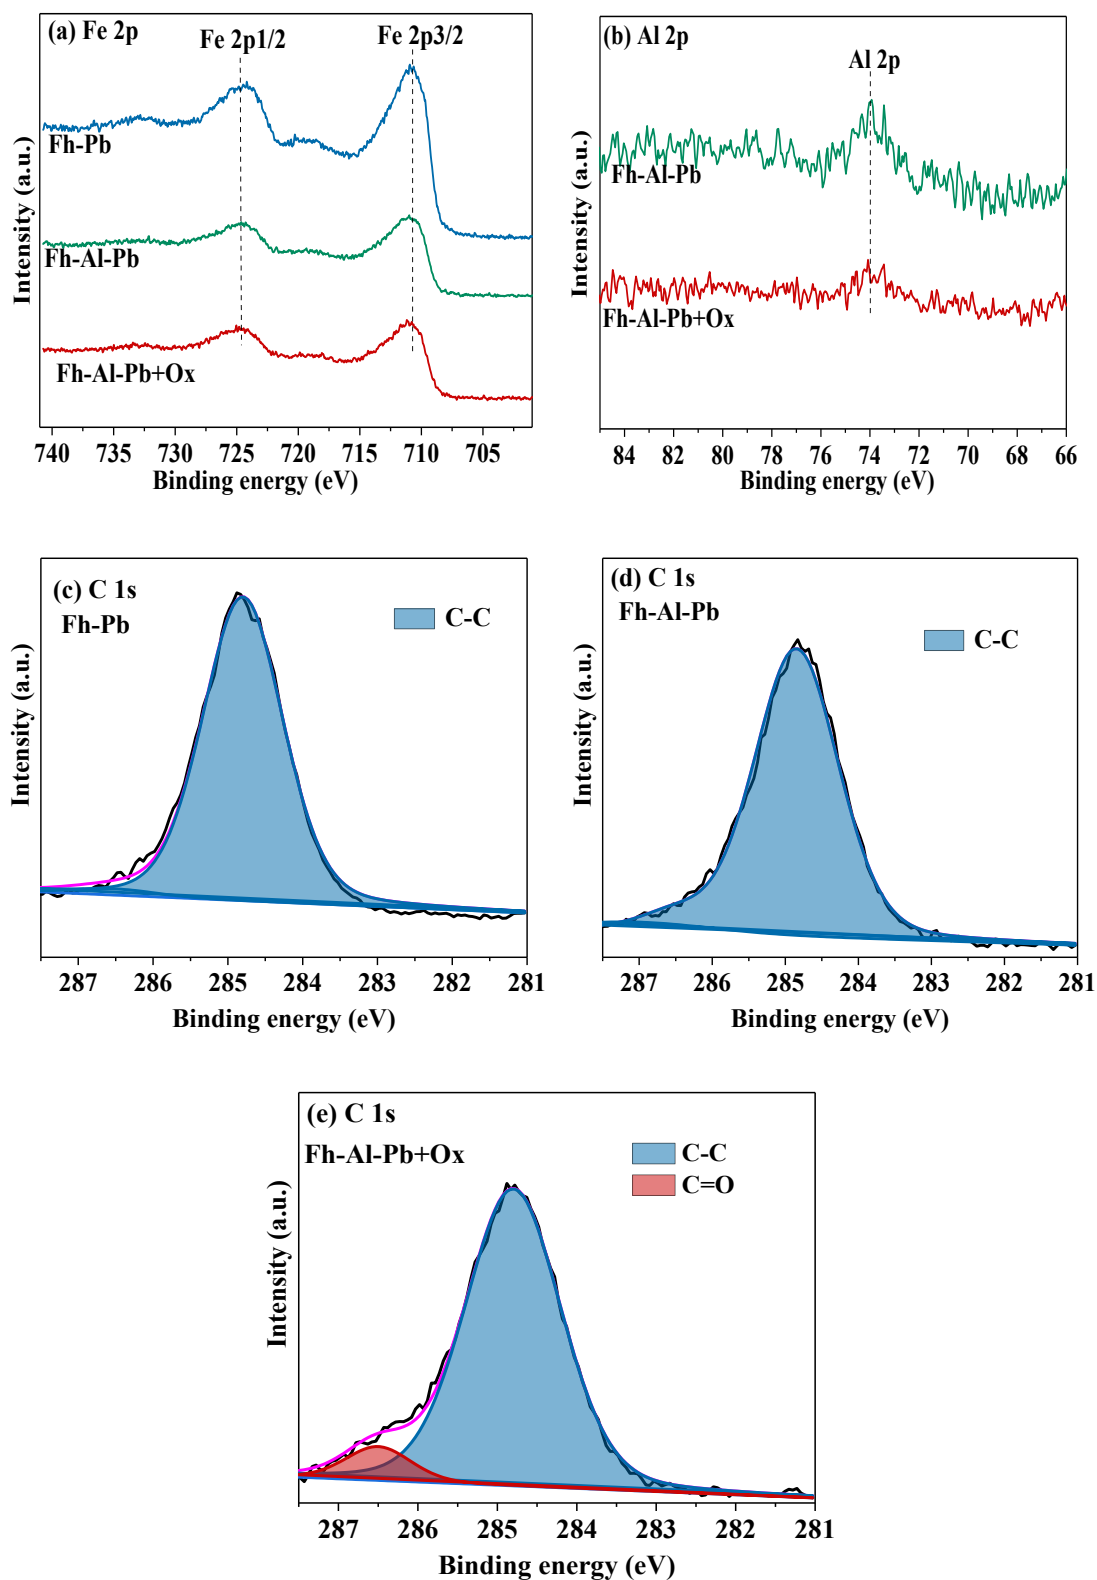

**Fig. S5** (a) Fe 2p spectra, (b) Al 2p spectra, (c) C 1s spectra of Fh-Pb, (d) C 1s spectra of Fh-Al-Pb in the absence of oxalic acid and (e) C 1s spectra of Fh-Al-Pb in the presence of oxalic acid.

**Table S1** Proportions of the transformation products of Fh-Pb, Fh-Al-Pb and Fh-Al-Pb with oxalic acid at initial pH of 5.0, 7.0 and 9.0.

| Sample                                  |       | Fh-Pb        |          |          | Fh-Al-Pb     |          |          | Fh-Al-Pb+Ox  |          |          |
|-----------------------------------------|-------|--------------|----------|----------|--------------|----------|----------|--------------|----------|----------|
| Mineral<br>phase<br><br>pH <sub>0</sub> | Time  | Ferrihydrite | Goethite | Hematite | Ferrihydrite | Goethite | Hematite | Ferrihydrite | Goethite | Hematite |
|                                         | (day) | (%)          | (%)      | (%)      | (%)          | (%)      | (%)      | (%)          | (%)      | (%)      |
| 5.0                                     | 0     | 100.0        | 0.0      | 0.0      | 100.0        | 0.0      | 0.0      | 100.0        | 0.0      | 0.0      |
|                                         | 4     | 16.8         | 10.2     | 73.0     | 53.1         | 0.0      | 46.9     | 6.9          | 0.0      | 93.1     |
|                                         | 7     | 3.9          | 9.3      | 86.8     | 17.7         | 0.0      | 82.3     | 1.8          | 0.0      | 98.2     |
| 7.0                                     | 0     | 100.0        | 0.0      | 0.0      | 100.0        | 0.0      | 0.0      | 100.0        | 0.0      | 0.0      |
|                                         | 4     | 22.3         | 34.1     | 43.6     | 99.9         | 0.0      | 0.1      | 2.1          | 0.0      | 97.9     |
|                                         | 7     | 5.1          | 22.1     | 72.8     | 55.9         | 0.0      | 44.1     | 1.8          | 0.0      | 98.2     |
| 9.0                                     | 0     | 100.0        | 0.0      | 0.0      | 100.0        | 0.0      | 0.0      | 100.0        | 0.0      | 0.0      |
|                                         | 4     | 17.8         | 13.0     | 69.2     | 15.8         | 0.0      | 84.2     | 4.7          | 0.0      | 95.3     |
|                                         | 7     | 0.1          | 15.3     | 84.6     | 1.9          | 0.0      | 98.1     | 1.7          | 0.0      | 98.3     |

**Table S2** Oxygen-containing functional groups proportion of samples after ageing for 7 days.

| Oxygen-containing<br>functional groups | After aging |              |                 |
|----------------------------------------|-------------|--------------|-----------------|
|                                        | Fh-Pb (%)   | Fh-Al-Pb (%) | Fh-Al-Pb+Ox (%) |
| M-O                                    | 43.0        | 45.6         | 46.3            |
| M-OH                                   | 42.0        | 44.4         | 37.5            |
| H <sub>2</sub> O                       | 15.0        | 10.0         | 16.2            |
